# Supplementary material for: Ultrasensitive measurement of huntingtin protein in cerebrospinal fluid demonstrates increase with Huntington disease stage and decrease following brain huntingtin suppression
Source: PubMed Central journal article supplement (PMC4502413; doi:10.1038/srep12166), 2015-07-15
Supplement: srep12166-s1.pdf [file srep12166-s1.pdf]

**Supplementary materials for: Ultrasensitive measurement of huntingtin protein in cerebrospinal fluid demonstrates increase with Huntington disease stage and decrease following brain huntingtin suppression**

Amber L. Southwell, Stephen E.P. Smith, Tessa R. Davis, Nicholas S. Caron, Erika B. Villanueva, Yuanyun Xie, Jennifer A. Collins, Min Li Ye, Aaron Sturrock, Blair R. Leavitt, Adam G. Schrum, Michael R. Hayden

**Supplementary Table S1. Summary of anti-HTT antibodies screened**

| <u>Antibody</u> | <u>Host</u> | <u>Species specificity</u> | <u>Epitope</u> | <u>HTT specificity</u> | <u>Validated applications</u> | <u>Source</u>  |
|-----------------|-------------|----------------------------|----------------|------------------------|-------------------------------|----------------|
| HD46            | Mouse       | Hu,Ms                      | aa1-17         | N-term                 | WB,IF,IP                      | Michael Hayden |
| BKP1            | Rabbit      | Hu,Ms                      | aa1-17         | N-term                 | WB,IF,IP,FRET                 | Michael Hayden |
| HD650           | Mouse       | Hu                         | aa650-655      | pan                    | WB,IF,IP                      | Michael Hayden |
| MW1             | Mouse       | Hu,Ms                      | polyQ          | mutant                 | WB,IF FRET                    | Paul Patterson |
| MW7             | Mouse       | Hu,Ms                      | polyP          | pan                    | WB,IF                         | Paul Patterson |
| 2166            | Mouse       | Hu,Ro,Rb                   | aa181-810      | pan                    | WB,IF,IP,ELISA,FRET           | Commercial     |
| 2168            | Mouse       | Hu,NHP                     | aa2146-2541    | C-term                 | WB,IF,IP,ELISA                | Commercial     |
| 1C2             | Mouse       | Hu                         | polyQ          | mutant                 | WB,IF,IP                      | Commercial     |
| HDB4E10         | Mouse       | Hu,Ms,Rb                   | aa1844-2131    | C-term                 | WB,IF,IP,ELISA                | Commercial     |
| HDA3E10         | Mouse       | Hu,Ms,Ra                   | aa997-1276     | pan                    | WB,IF,IP,ELISA                | Commercial     |
| EP867Y          | Rabbit      | Hu,Ro                      | aa511-588      | pan                    | WB,IF,IP,ELISA,FACS           | Commercial     |
| H-300           | Rabbit      | Hu,Ro                      | aa2845-3144    | C-term                 | WB,IF,IP,ELISA                | Commercial     |

Hu-human, Ms-mouse, Ro-rodent, Rb-rabbit, NHP-non-human primate, Ra-rat, WB-Western blot, IF-immunofluorescence, IP-immunoprecipitation, FRET-fluorescence resonance energy transfer, ELISA-enzyme-linked immunosorbent assay, FACS-fluorescence activated cell sorting

## Supplementary Figure S1

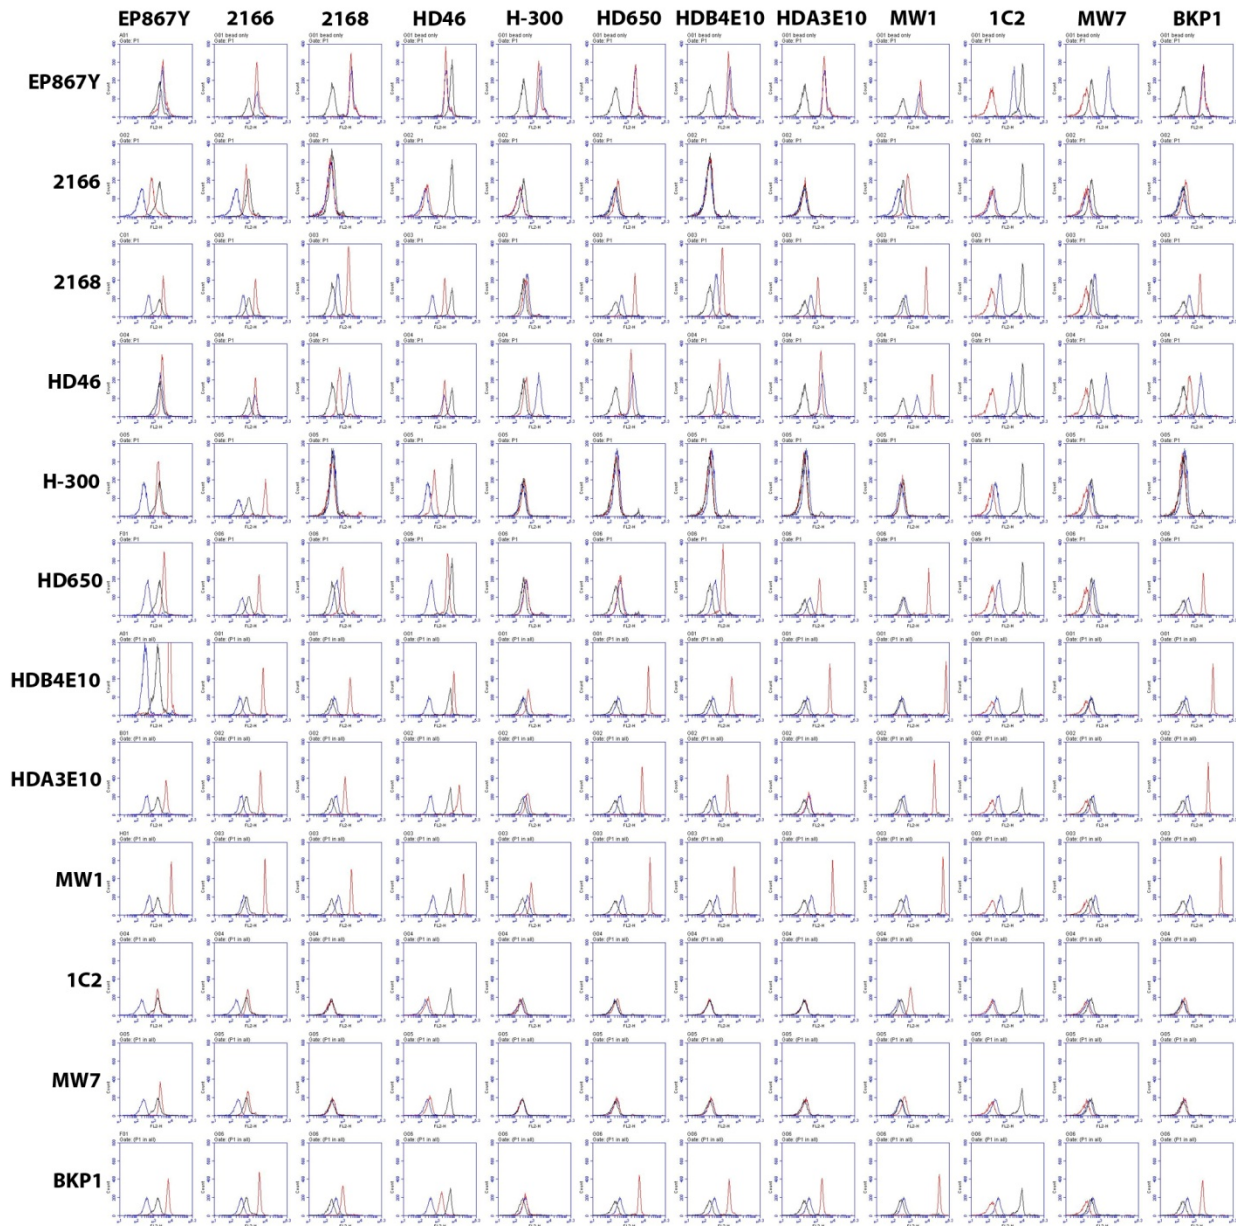

**Supplementary Figure S1. Screen to identify anti-HTT capture-probe antibody pairs for IP-FCM.** Brain lysate from Hu9718 mice containing abundant human wt and muHTT protein was immunoprecipitated onto latex micro-beads and detected by flow cytometry. Rows represent capture antibodies. Columns represent probe antibodies. Black and blue traces are IgG capture control and IgG probe control, respectively. Red traces are experimental. Red traces of higher magnitude (i.e. shifted to the right) than control traces indicate positive HTT IP-FCM signal.

## Supplementary figure S2

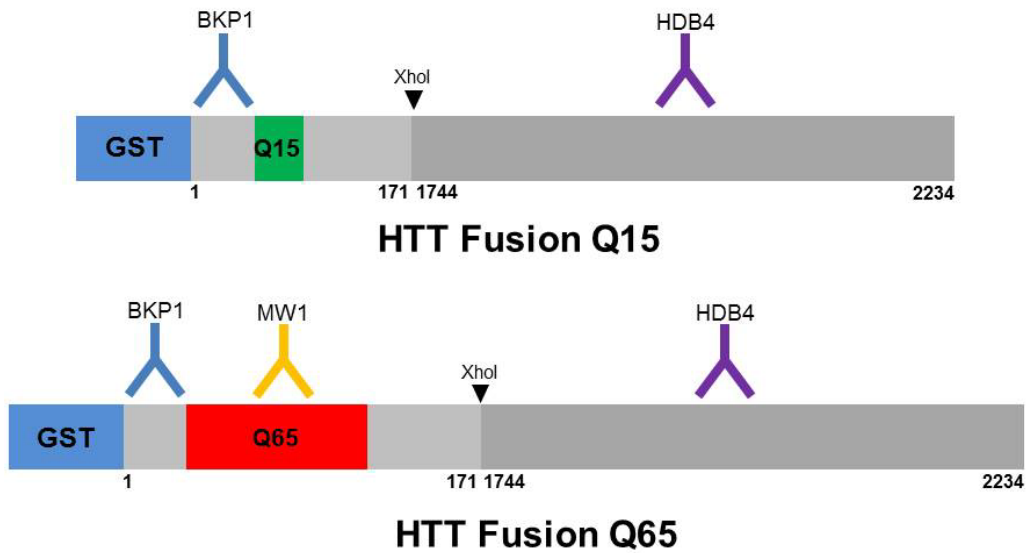

**Supplementary figure S2. Schematic of recombinant HTT fusion proteins.** Recombinant HTT fusion protein with either 15 (non-expanded) or 65 (expanded) glutamines was generated from the N-terminal 171 aa, containing the BKP1 and MW1 binding sites, and aa 1744-2234, which encompasses the antigenic fragment that was used to generate HDB4, aa 1844-2131. The XhoI restriction site found naturally in HTT at residue 171 was used to generate the fusion protein.

Supplementary figure S3

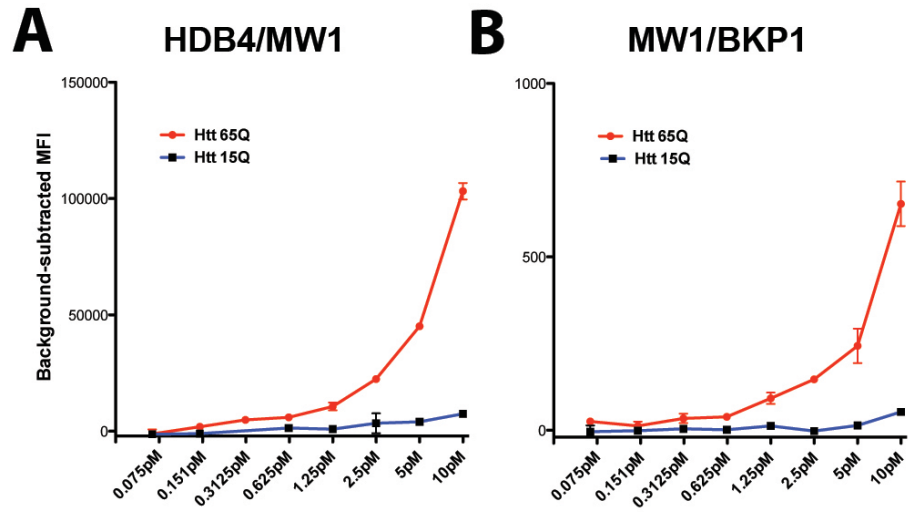

**Supplementary figure S3. Standard curve of recombinant HTT fusion protein in cKO brain lysate.** (a,b) HTT-IP-FCM using serial 1:50 dilutions of recombinant HTT fusion protein with 15 or 65 Q using (a) HDB4/MW1 or (b) MW1/BKP1 in cKO brain lysate. Dashed lines indicate the mean  $\pm$  SEM of the no-protein controls, showing assay background.
